# Supplementary material for: Biological characterization of expression quantitative trait loci (eQTLs) showing tissue-specific opposite directional effects
Source: PubMed Central journal article supplement (PMC6871526; doi:10.1038/s41431-019-0468-4), 2019-07-11
Supplement: 41431_2019_468_MOESM1_ESM.pdf [file 41431_2019_468_MOESM1_ESM.pdf]

For a given *eQTL-Gene*, between tissue-x and tissue-y:

| analysis table                           | tissue-x     | tissue-y     |
|------------------------------------------|--------------|--------------|
| SNP-x<br><i>top-eQTL-SNP</i> in tissue-x | $\beta_{xx}$ | $\beta_{xy}$ |
| SNP-y<br><i>top-eQTL-SNP</i> in tissue-y | $\beta_{yx}$ | $\beta_{yy}$ |

$\beta$ : effect size of eQTL signal.

If SNP-x(y) is not significantly active in tissue-y(x),  $\beta_{xy}$  ( $\beta_{yx}$ ) is set as 0.

**35,207,136** analysis tables (**31,212 eQTL-Genes**, **1,128** tissue pairs from 48 tissues)

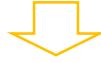

The given *eQTL-Gene* has significant eQTL SNP(s) in both tissues ( $\beta_{xx} \neq 0 \cap \beta_{yy} \neq 0$ )

**3,540,453** analysis tables

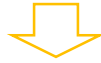

At least one of SNP-x and SNP-y is significant in both tissues ( $\beta_{xy} \neq 0 \cup \beta_{yx} \neq 0$ )

**2,488,564** analysis tables

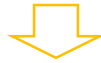

| Number of analysis tables | Direction difference of eQTL effects<br>(sign of $\beta_{xx} \times \beta_{xy}$ and $\beta_{yx} \times \beta_{yy}$ ) |                                                                                                             |
|---------------------------|----------------------------------------------------------------------------------------------------------------------|-------------------------------------------------------------------------------------------------------------|
|                           | Opposite<br>(-/-, -/0, 0/-)                                                                                          | Others<br>(+/+, +/0, 0/+, +/-, -/+)                                                                         |
| $r^2 > 0.8$               | <br><b>1a: 15,583</b>             | <br><b>2a: 1,570,689</b> |
| $r^2 \leq 0.8$            | <br><b>1b: 27,386</b>             | <br><b>2b: 874,906</b>  |

genes and SNPs in group **1a** or **2a**  $\Rightarrow$  *multi-eQTL-Genes* and *multi-eQTL-SNPs*

genes and SNPs in group **1a**  $\Rightarrow$  *opp-multi-eQTL-Genes* and *opp-multi-eQTL-SNPs*

### Figure S1. Scheme to analyze direction of eQTL effects between different tissues.

An analysis table was made for each *eQTL-Gene* between each tissue pair (35,207,136 analysis tables in total). SNP-x is *top-eQTL-SNP* of the given *eQTL-Gene* in tissue-x.  $\beta_{xy}$  is effect size of SNP-x in tissue-y (if SNP-x is not significantly detected in tissue-y,  $\beta_{xy}$  was set as 0). Only the cases that the given *eQTL-Gene* has SNP(s) with significant eQTL signal in both of the tissue pair (i.e.,  $\beta_{xx} \neq 0 \cap \beta_{yy} \neq 0$ ) were moved into the next analysis (3,540,453 analysis tables). When at least one of SNP-x and SNP-y is significant in both tissues (i.e.,  $\beta_{xy} \neq 0 \cup \beta_{yx} \neq 0$ ), the direction difference of the eQTL effects between the tissue pair can be discussed. Therefore, the cases of (i) SNP-x and SNP-y are identical (i.e.,  $\beta_{xx} = \beta_{yx}$  and  $\beta_{xy} = \beta_{yy}$ ) and (ii) SNP-x and SNP-y are not identical but at least one of them is significant in both tissues were selected (2,488,564 analysis tables). The direction difference of the eQTL effects between the tissue pair was determined by the sign of  $\beta_{xx} \times \beta_{xy}$  and  $\beta_{yx} \times \beta_{yy}$ , and the cases of  $\beta_{xx} \times \beta_{xy} \leq 0 \cup \beta_{yx} \times \beta_{yy} \leq 0$  were considered as opposite direction. By addition of LD evaluation between SNP-x and SNP-y ( $r^2$  cutoff is 0.8. If SNP-x and SNP-y are identical,  $r^2$  was set as 1), the analysis tables were divided into four groups (**1a**, **1b**, **2a**, and **2b**). The *eQTL-Genes* and *top-eQTL-SNPs* in group **1a** or **2a** were designated as *multi-eQTL-Genes* and *multi-eQTL-SNPs*, and those in group **1a** were designated as *opp-multi-eQTL-Genes* and *opp-multi-eQTL-SNPs*.

## A *multi-eQTL-SNPs*

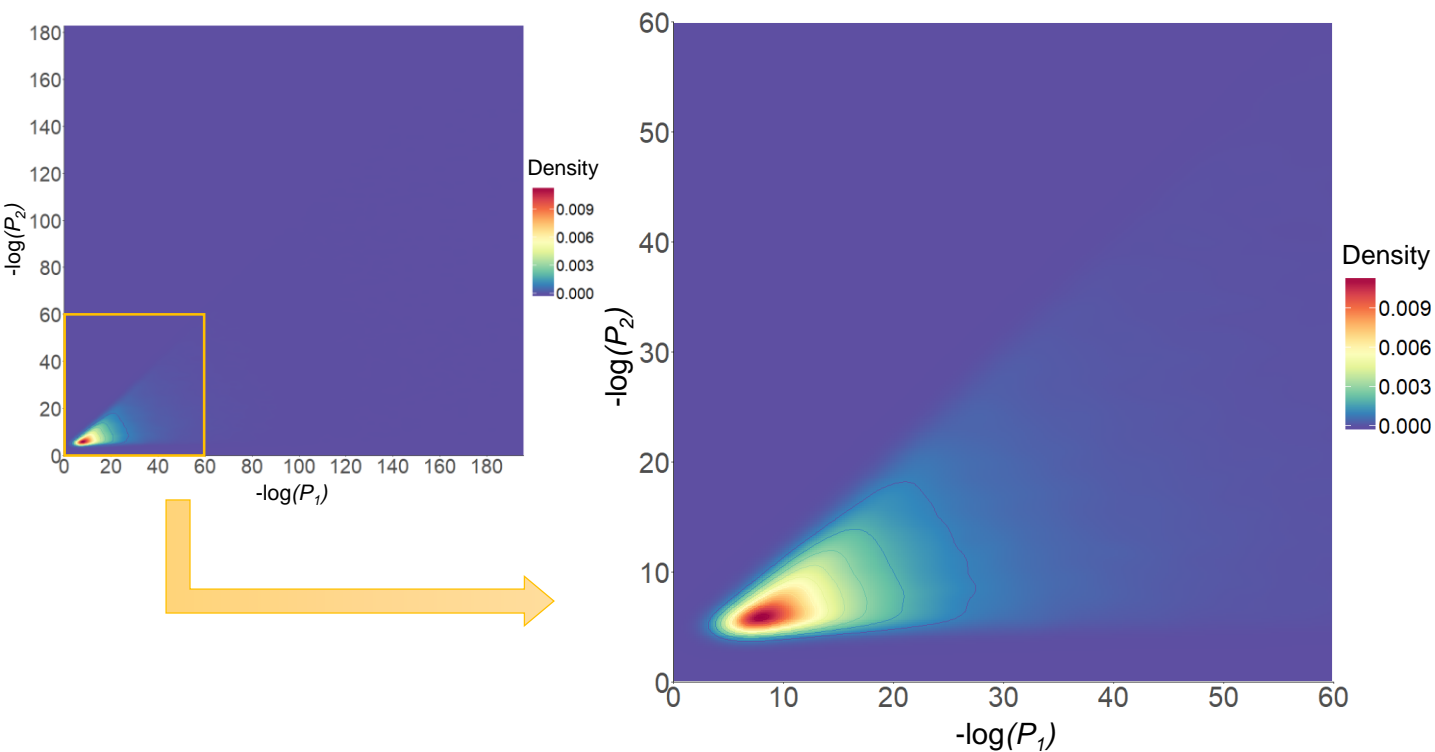

## B *opp-multi-eQTL-SNPs*

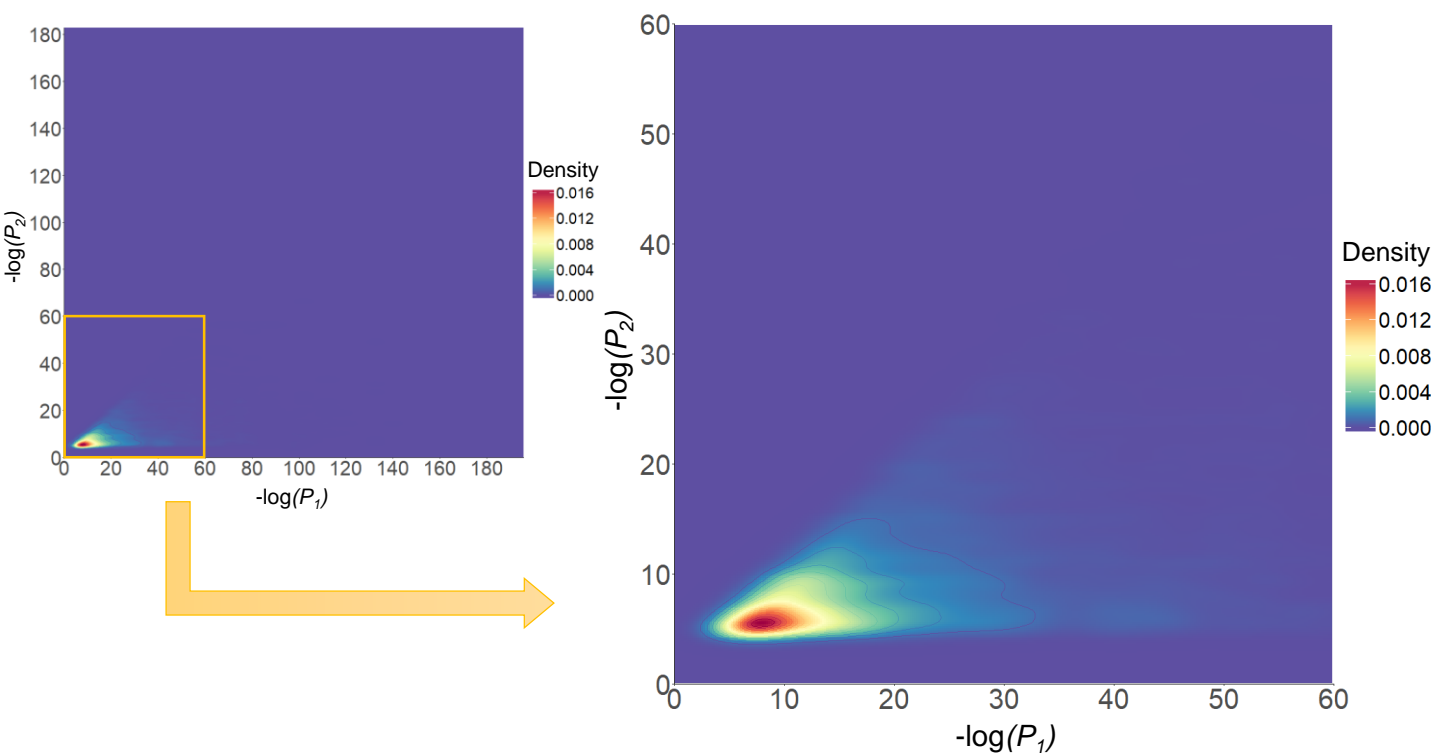

**Figure S2. 2D density map of negative logarithm of p-value\_1 and 2.** Of the two p-values in each analyzed tissue pair, p-value\_1 and 2 were designated as lower and higher p-values, respectively. 2D density map is depicted for the eQTL effects of *multi-eQTL-SNPs* (A), and *opp-multi-eQTL-SNPs* (B). The difference of the density between them is also shown (C).

**C** Density difference between *multi-eQTL-SNPs* and *opp-multi-eQTL-SNPs*

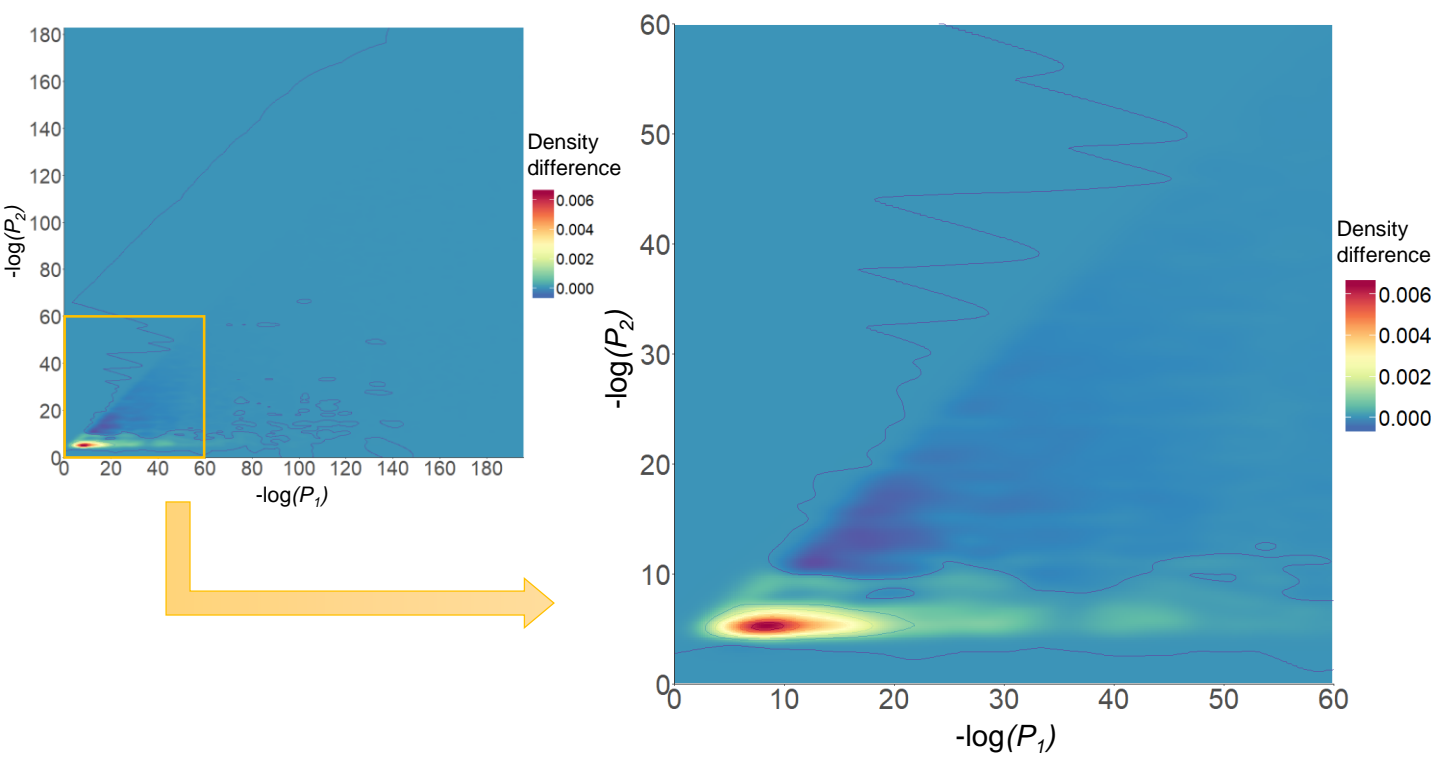

**Figure S2.** (continued)

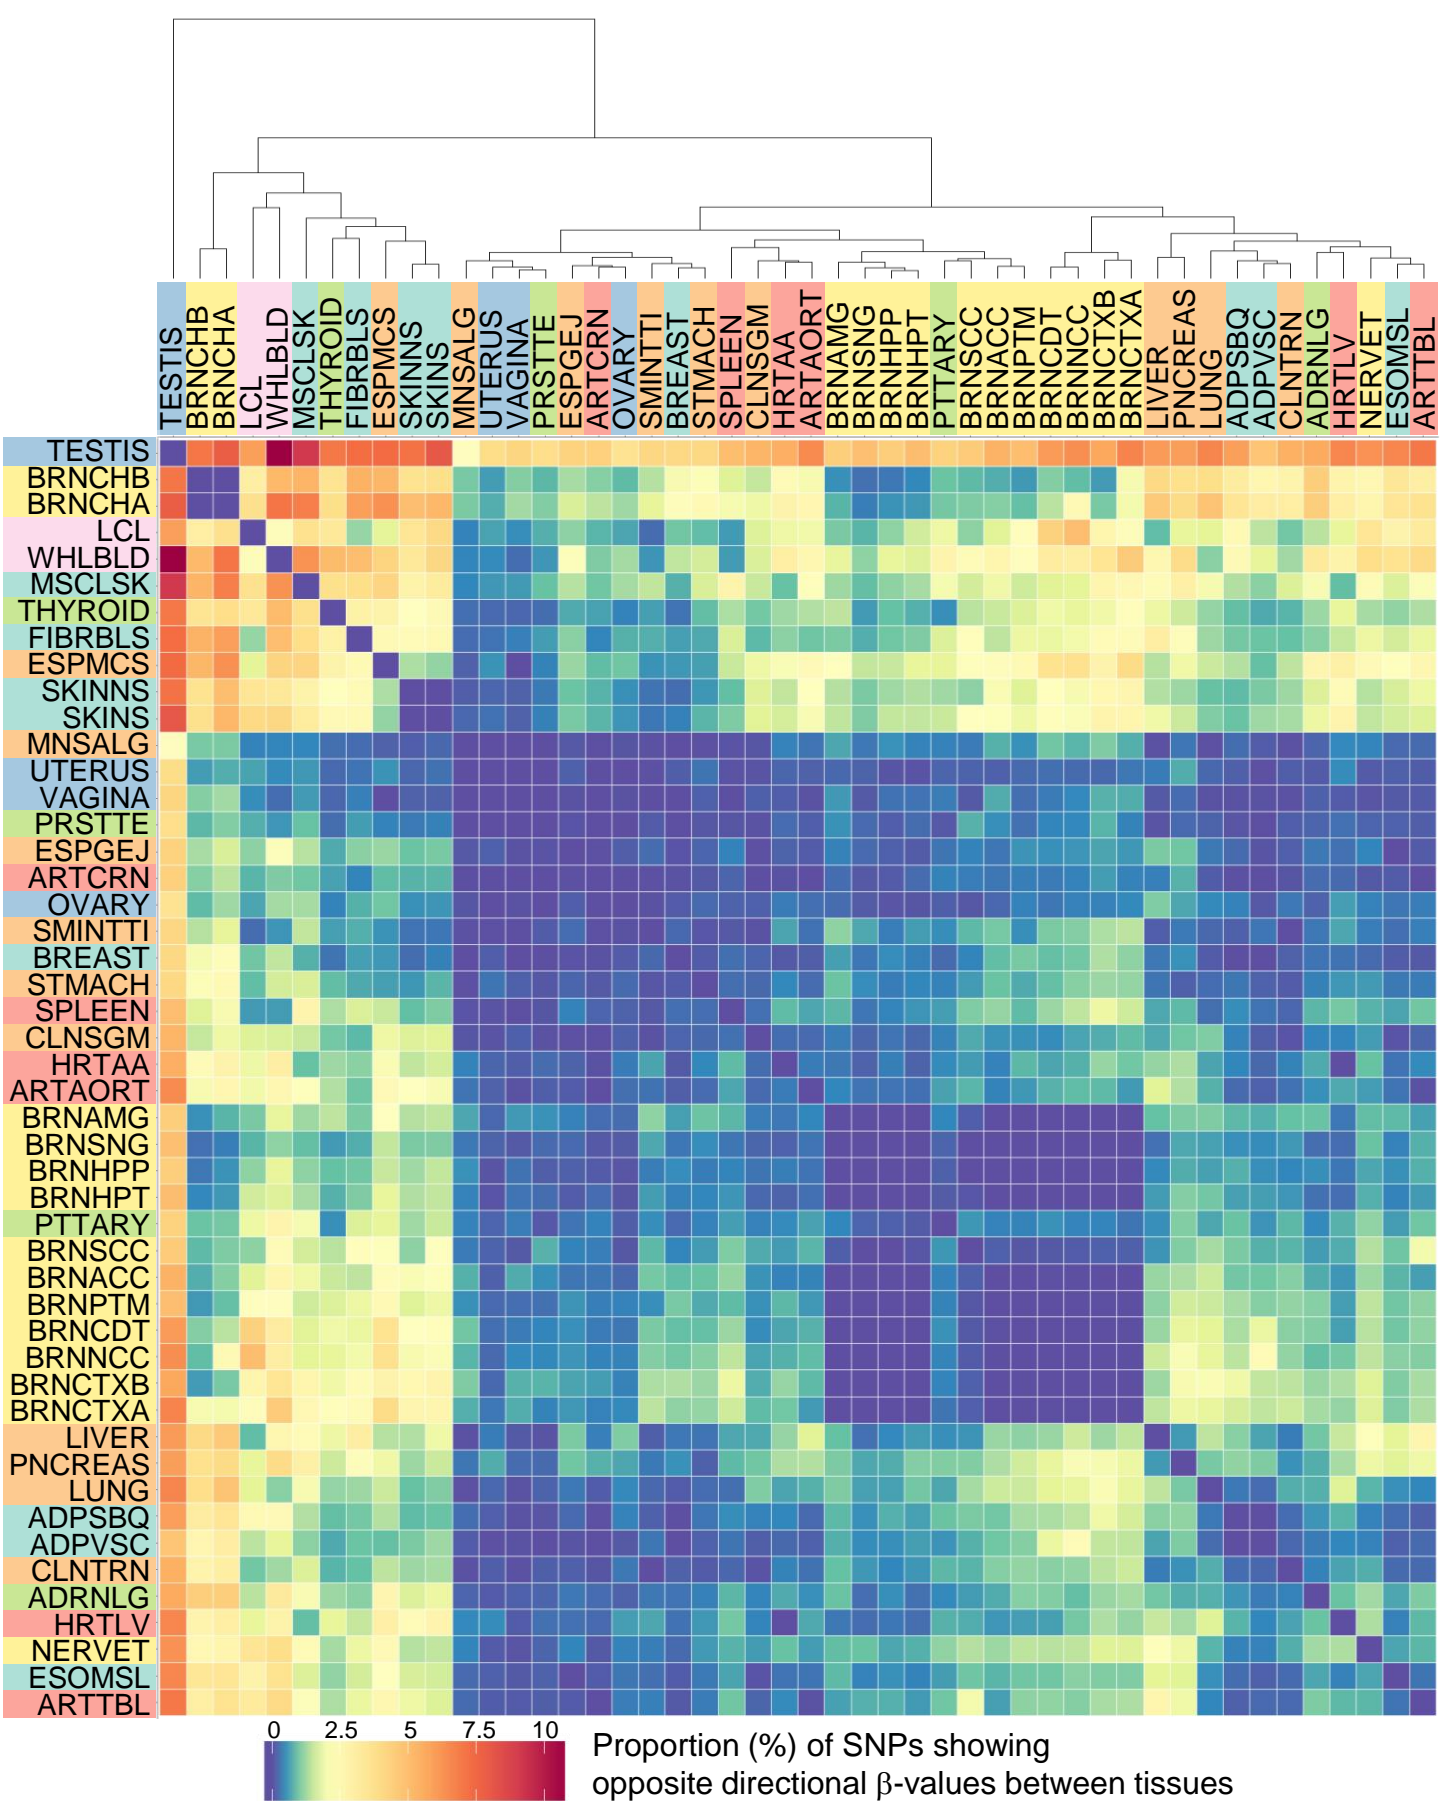

**Figure S3. Clustering analysis of tissue types based on the proportions of SNPs showing opposite directional  $\beta$ -values between tissues.**

## eQTL effects on solute carrier family 37 member 1 gene (*SLC37A1*)

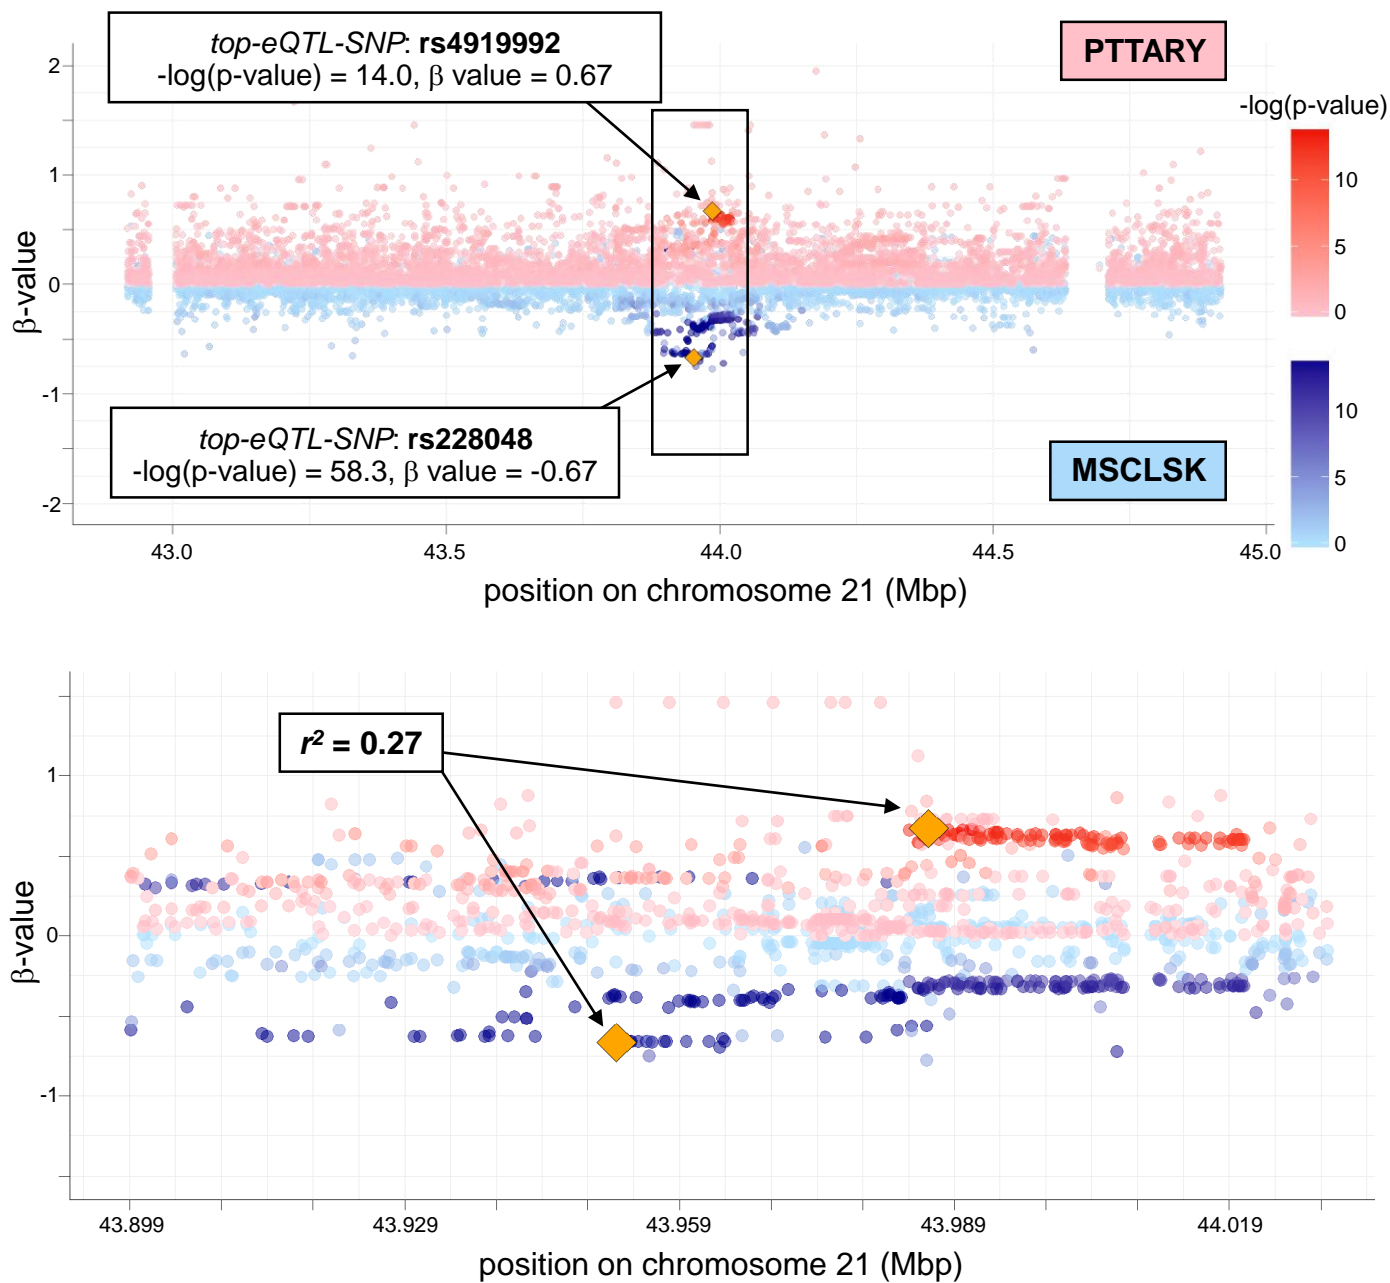

### Figure S4. Example of less meaningful opposite eQTL effects.

Distribution of the  $\beta$ -value and negative logarithm of p-value of all tested SNPs within 1 Mbp distance from TSS of solute carrier family 37 member 1 gene (*SLC37A1*) is shown with respect to the position on chromosome. The lower panel is the enlarged view of the square part in the upper panel. The eQTL effects on *SLC37A1* can be considered in the opposite direction between pituitary (PTTARY) and skeletal muscle (MSCLSK), if the discordance is evaluated by all (including secondary) eQTL signals or by the primary eQTL signals without LD calculation. However, the top-eQTL-SNPs in the two tissues (rs4919992 for PTTARY and rs228048 for MSCLSK) are localized in the different LD blocks ( $r^2 < 0.8$ ). rs228048 was significant only in MSCLSK. Although rs4919992 was significant in both tissues, it composes the secondary marginal eQTL signals in MSCLSK, which are independent from the far more significant primary eQTL signals tagged by rs228048. Therefore, it is dubious to consider this kind of eQTL effects as the meaningful opposite effects between different tissues.

**Table S1. Detailed description of SNPs based on the reference genome sequence (GRCh37) for the rsIDs that appeared in the main text.**

| dbSNP rsID  | Sequence name     | Change                     |
|-------------|-------------------|----------------------------|
| rs1991556   | GRCh37.p13 chr 1  | NC_000001.10:g.797440T>C   |
| rs112411928 | GRCh37.p13 chr 17 | NC_000017.10:g.44139762C>G |
| rs2739330   | GRCh37.p13 chr 22 | NC_000022.10:g.24295286T>C |
| rs228048    | GRCh37.p13 chr 21 | NC_000021.8:g.43952141T>C  |
| rs4919992   | GRCh37.p13 chr 21 | NC_000021.8:g.43986175C>T  |
| rs5760120   | GRCh37.p13 chr 22 | NC_000022.10:g.24266867G>A |
| rs5760119   | GRCh37.p13 chr 22 | NC_000022.10:g.24266831G>C |

**Table S2. Abbreviations and organ system categories assigned for 48 tissues.**

| Tissue Name                           | Abbreviation | Organ System Category                |
|---------------------------------------|--------------|--------------------------------------|
| Brain_Amygdala                        | BRNAMG       | Nervous System                       |
| Brain_Anterior_cingulate_cortex_BA24  | BRNACC       | Nervous System                       |
| Brain_Caudate_basal_ganglia           | BRNCDT       | Nervous System                       |
| Brain_Cerebellar_Hemisphere           | BRNCHB       | Nervous System                       |
| Brain_Cerebellum                      | BRNCHA       | Nervous System                       |
| Brain_Cortex                          | BRNCTXA      | Nervous System                       |
| Brain_Frontal_Cortex_BA9              | BRNCTXB      | Nervous System                       |
| Brain_Hippocampus                     | BRNHPP       | Nervous System                       |
| Brain_Hypothalamus                    | BRNHPT       | Nervous System                       |
| Brain_Nucleus_accumbens_basal_ganglia | BRNNCC       | Nervous System                       |
| Brain_Putamen_basal_ganglia           | BRNPTM       | Nervous System                       |
| Brain_Spinal_cord_cervical_c-1        | BRNSCC       | Nervous System                       |
| Brain_Substantia_nigra                | BRNSNG       | Nervous System                       |
| Nerve_Tibial                          | NERVET       | Nervous System                       |
| Artery_Aorta                          | ARTAORT      | Cardiovascular/Lymphatic System      |
| Artery_Coronary                       | ARTCRN       | Cardiovascular/Lymphatic System      |
| Artery_Tibial                         | ARTTBL       | Cardiovascular/Lymphatic System      |
| Heart_Atrial_Appendage                | HRTAA        | Cardiovascular/Lymphatic System      |
| Heart_Left_Ventricle                  | HRTLTV       | Cardiovascular/Lymphatic System      |
| Spleen                                | SPLEEN       | Cardiovascular/Lymphatic System      |
| Cells_EBV-transformed_lymphocytes     | LCL          | Hematopoietic Cells                  |
| Whole_Blood                           | WHLBLD       | Hematopoietic Cells                  |
| Adrenal_Gland                         | ADRNLG       | Endocrine System                     |
| Pituitary                             | PTTARY       | Endocrine System                     |
| Prostate                              | PRSTTE       | Endocrine System                     |
| Thyroid                               | THYROID      | Endocrine System                     |
| Adipose_Subcutaneous                  | ADPSBQ       | Integumentary/Musculoskeletal System |
| Adipose_Visceral_Omentum              | ADPVSC       | Integumentary/Musculoskeletal System |
| Breast_Mammary_Tissue                 | BREAST       | Integumentary/Musculoskeletal System |
| Cells_Transformed_fibroblasts         | FIBRBLS      | Integumentary/Musculoskeletal System |
| Esophagus_Muscularis                  | ESOMSL       | Integumentary/Musculoskeletal System |
| Muscle_Skeletal                       | MSCLSK       | Integumentary/Musculoskeletal System |
| Skin_Not_Sun_Exposed_Suprapubic       | SKINNS       | Integumentary/Musculoskeletal System |
| Skin_Sun_Exposed_Lower_leg            | SKINS        | Integumentary/Musculoskeletal System |
| Colon_Sigmoid                         | CLNSGM       | Gastrointestinal/Respiratory System  |
| Colon_Transverse                      | CLNTRN       | Gastrointestinal/Respiratory System  |
| Esophagus_Gastroesophageal_Junction   | ESPEJ        | Gastrointestinal/Respiratory System  |
| Esophagus_Mucosa                      | ESPMCS       | Gastrointestinal/Respiratory System  |
| Liver                                 | LIVER        | Gastrointestinal/Respiratory System  |
| Lung                                  | LUNG         | Gastrointestinal/Respiratory System  |
| Minor_Salivary_Gland                  | MNSALG       | Gastrointestinal/Respiratory System  |
| Pancreas                              | PNCREAS      | Gastrointestinal/Respiratory System  |
| Small_Intestine_Terminal_Ileum        | SMINTTI      | Gastrointestinal/Respiratory System  |
| Stomach                               | STMACH       | Gastrointestinal/Respiratory System  |
| Ovary                                 | OVARY        | Genitourinary System                 |
| Testis                                | TESTIS       | Genitourinary System                 |
| Uterus                                | UTERUS       | Genitourinary System                 |
| Vagina                                | VAGINA       | Genitourinary System                 |

**Table S3. Averaged proportions of SNPs showing opposite directional  $\beta$ -values between the organ system categories. (Minimum value in each row is highlighted in red.)**

|             | <b>Nerv</b> | <b>Card</b> | <b>Hem</b> | <b>Endo</b> | <b>Mus</b> | <b>Gast</b> | <b>Gen</b> |
|-------------|-------------|-------------|------------|-------------|------------|-------------|------------|
| <b>Nerv</b> | 0.54        | 0.92        | 2.05       | 0.97        | 1.59       | 1.35        | 1.67       |
| <b>Card</b> | 0.92        | 0.34        | 1.48       | 0.63        | 0.95       | 0.73        | 1.55       |
| <b>Hem</b>  | 2.05        | 1.48        | 2.77       | 1.91        | 2.26       | 1.54        | 2.55       |
| <b>Endo</b> | 0.97        | 0.63        | 1.91       | 0.44        | 1.14       | 0.76        | 1.40       |
| <b>Mus</b>  | 1.59        | 0.95        | 2.26       | 1.14        | 1.30       | 1.09        | 1.86       |
| <b>Gast</b> | 1.35        | 0.73        | 1.54       | 0.76        | 1.09       | 0.63        | 1.51       |
| <b>Gen</b>  | 1.67        | 1.55        | 2.55       | 1.40        | 1.86       | 1.51        | 1.95       |

Nerv, nervous system

Card, cardiovascular/lymphatic system

Hem, hematopoietic cells

Endo, endocrine system

Mus, integumentary/musculoskeletal system

Gast, gastrointestinal/respiratory system

Gen, genitourinary system



**Table S4. Fractions of SNPs with epigenetic annotation in Roadmap Epigenomics database.**

| Epigenetic annotation | Total number of cell lines annotated | mean fraction of annotated SNPs across cell lines (%) |                                                           |                            |
|-----------------------|--------------------------------------|-------------------------------------------------------|-----------------------------------------------------------|----------------------------|
|                       |                                      | <i>multi-eQTL-SNPs</i>                                | TSS-distance-adjusted <i>multi-eQTL-SNPs</i> <sup>a</sup> | <i>opp-multi-eQTL-SNPs</i> |
| DNase                 | 53                                   | 7.6                                                   | 8.6 [8.2, 8.9]                                            | 9.6                        |
| H3K4me1               | 127                                  | 20.6                                                  | 21.9 [21.4, 22.3]                                         | 24.0                       |
| H3K4me3               | 127                                  | 13.2                                                  | 15.0 [14.5, 15.4]                                         | 15.7                       |
| H3K9ac                | 62                                   | 17.0                                                  | 18.7 [18.3, 19.2]                                         | 20.0                       |
| H3K27ac               | 98                                   | 17.1                                                  | 18.5 [18.1, 19.0]                                         | 19.8                       |

(a) Distribution of TSS distance in *multi-eQTL-SNPs* was adjusted on that in *opp-multi-eQTL-SNPs* by random sampling. The sampling was repeated by 10,000 times, and the mean is shown with 95% confidence interval in parentheses.

**Table S5. Replication rates (%) of the extracted SNPs in other eQTL datasets.**

| eQTL study <sup>a</sup> | TSS-distance-adjusted<br><i>multi-eQTL-SNPs</i> <sup>b</sup> | <i>opp-multi-eQTL-SNPs</i> |
|-------------------------|--------------------------------------------------------------|----------------------------|
| Montgomery et al, 2010  | 0.24                                                         | 0.18                       |
| Schadt et al, 2008      | 0.39                                                         | 0.47                       |
| Gibbs et al, 2010       | 1.12                                                         | 1.66                       |
| Stranger et al, 2008    | 1.53                                                         | 1.91                       |
| Li et al, 2014          | 0.91                                                         | 0.76                       |
| Westra et al, 2013      | 22.2                                                         | 24.1                       |
| Hao et al, 2012         | 2.02                                                         | 1.71                       |
| Koopmann et al, 2014    | 0.99                                                         | 1.26                       |
| Fairfax et al, 2014     | 0.24                                                         | 0.17                       |
| Grundberg et al, 2011   | 0.51                                                         | 0.48                       |
| Lappalainen et al, 2013 | 49.0                                                         | 53.7                       |
| Ramasamy et al, 2014    | 1.60                                                         | 1.03                       |

(a) Annotation data for the listed eQTL studies were downloaded from the HaploReg v4.1 website: <https://pubs.broadinstitute.org/mammals/haploreg/data/>

(b) A subset of *multi-eQTL-SNPs*, randomly sampled so that the distribution of TSS distance was adjusted on that of *opp-multi-eQTL-SNPs*.
